# Supplementary material
Source: publisher site journal article supplement (http://www.dovepress.com/get_supplementary_file.php?f=235037.docx)
Supplement: Supplementary file 1 [file get_supplementary_file.php]

**Supplementary Table 1 The relationship between lncRNA LINC01194 expression and other general clinical data of patients.**

| **Clinicopathological characteristics** | **LINC01194 expression** | | ***P*-value** |
| --- | --- | --- | --- |
| **High (*n* = 16)** | **Low (*n* = 10)** |
| **Gender** |  |  | 0.174 |
| Male | 9 | 4 |  |
| Female | 7 | 6 |  |
| **Age (years)** |  |  | 0.811 |
| <60 | 6 | 4 |  |
| ≥60 | 10 | 6 |  |
| **Smoking history** |  |  | 0.258 |
| Smokers | 11 | 3 |  |
| Never smokers | 5 | 7 |  |
| **Tumor size (cm)** |  |  | 0.028 |
| <3 | 5 | 6 |  |
| ≥3 | 11 | 4 |  |
| **TNM stage** |  |  | 0.003 |
| I–II | 6 | 8 |  |
| III–IV | 10 | 2 |  |
| **Lymph node metastasis** |  |  | 0.015 |
| Negative | 4 | 8 |  |
| Positive | 12 | 2 |  |
